# Supplementary material for: Reactive Oxygen Species-Dependent Activation of EGFR/Akt/p38 Mitogen-Activated Protein Kinase and JNK1/2/FoxO1 and AP-1 Pathways in Human Pulmonary Alveolar Epithelial Cells Leads to Up-Regulation of COX-2/PGE2 Induced by Silica Nanoparticles
Source: MDPI journal article supplement (doi:10.3390/biomedicines11102628), 2023-09-25
Supplement: s1 [file s1]

|            | Control |     |     |     | si-p38α |     |     |     |
|------------|---------|-----|-----|-----|---------|-----|-----|-----|
| Time (min) | 0       | 90  | 120 | 150 | 0       | 90  | 120 | 150 |
| p38α       | 1.0     | 1.0 | 1.0 | 1.0 | 0.3     | 0.3 | 0.4 | 0.3 |
| p-p38      | 1.0     | 2.4 | 3.9 | 4.1 | 1.0     | 1.1 | 1.0 | 1.1 |
| p-FoxO1    | 1.0     | 2.1 | 2.4 | 2.6 | 1.0     | 0.9 | 0.8 | 0.7 |
| p-c-Jun    | 1.0     | 2.8 | 3.4 | 3.6 | 1.0     | 1.4 | 1.5 | 1.0 |
| p-ATF2     | 1.0     | 2.0 | 2.0 | 2.2 | 1.0     | 0.8 | 0.6 | 0.6 |
| ATF2       | 1.0     | 1.0 | 1.0 | 1.3 | 1.0     | 0.8 | 1.0 | 0.8 |
| p-JunB     | 1.0     | 1.0 | 5.3 | 5.1 | 1.0     | 2.5 | 5.4 | 5.0 |
| JunB       | 1.0     | 1.1 | 1.2 | 1.2 | 1.0     | 1.1 | 1.1 | 1.1 |
| p-JunD     | 1.0     | 2.5 | 3.4 | 3.6 | 1.0     | 1.5 | 1.8 | 1.8 |
| JunD       | 1.0     | 1.0 | 1.0 | 1.0 | 1.0     | 1.0 | 0.8 | 0.9 |
| GAPDH      |         |     |     |     |         |     |     |     |

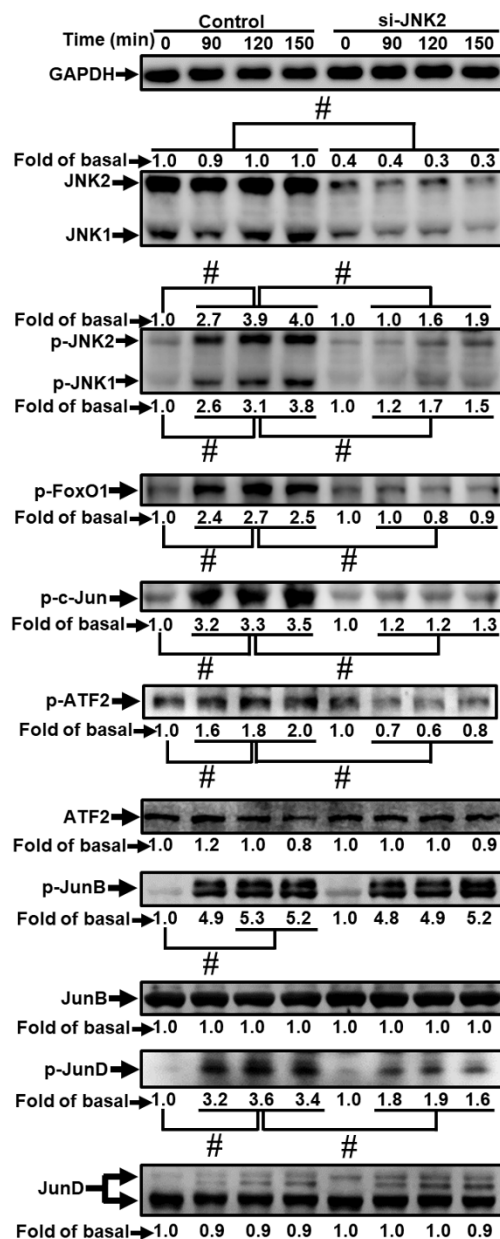

**Supplementary Figure S1. In HPAEpiCs, p38 MAPK and JNK1/2 play a role in the phosphorylation of AP-1 proteins induced by SiNPs.** Cells were transfected with siRNA of scrambled, (A) p38, or (B) JNK2 and then incubated with 25  $\mu\text{g/ml}$  SiNPs for the indicated times. The protein levels of phospho-p38, total p38, phospho-JNK1/2, total JNK1/2, phospho-c-Jun, phospho-ATF2, total ATF2, phospho-JunB, total JunB, phospho-JunD, total JunD, and GAPDH were analyzed by Western blot. Data are expressed as the mean $\pm$ S.E.M. of 3 independent experiments. # $p<0.01$ , as compared between the two indicated groups.
